# Supplementary material
Source: Springer Nature journal article supplement (https://www.springermedizin.de/resource/supplementary/12889_2006_643_MOESM1_ESM.pdf/9502116)

**Probability of seroconversion**

1,0  
0,8  
0,6  
0,4  
0,2  
0,0

0 6 12 18 24 30 36 42

**Months**

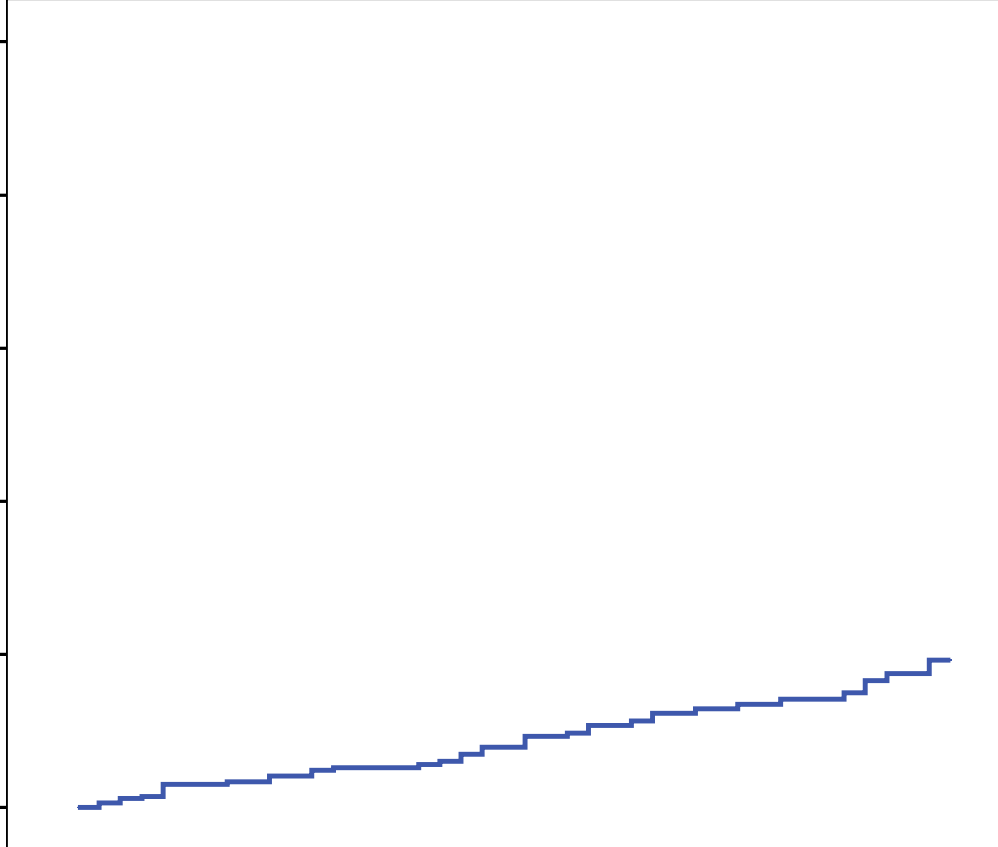

Supplement: MOESM1 [file 9502116]
